# Supplementary material for: Endoplasmic Reticulum Stress Increases DUSP5 Expression via PERK-CHOP Pathway, Leading to Hepatocyte Death
Source: MDPI journal article supplement (doi:10.3390/ijms20184369), 2019-09-05
Supplement: s1 [file s1]

**Supplementary Table 1. The primer sequences for qRT-PCR assays**

| Species | Gene names     | Pairs   | Primer sequences (5'-3') | Annealing temperatures for PCR (°C) |
|---------|----------------|---------|--------------------------|-------------------------------------|
| Mouse   | DUSP5          | Forward | TCGTGCTGGACCACGGTAG      | 58                                  |
|         |                | Reverse | CTGAGAACGGGCTTTCCACA     |                                     |
|         | DUSP2          | Forward | TATGACCAGGGTGGTCCTGT     | 58                                  |
|         |                | Reverse | GGCACTGATCTCCACCATCT     |                                     |
|         | DUSP11         | Forward | CACCAACAACAAACCTGTGAA    | 58                                  |
|         |                | Reverse | CCTCGCACTCCAGAAGAATC     |                                     |
|         | $\beta$ -Actin | Forward | CTGAGAGGGAAATCGTGCGT     | 58                                  |
|         |                | Reverse | TGTTGGCATAGAGGTCTTTACGG  |                                     |
