# Supplementary figures and images for: Endoplasmic Reticulum Stress Increases DUSP5 Expression via PERK-CHOP Pathway, Leading to Hepatocyte Death
Source: MDPI journal article supplement (doi:10.3390/ijms20184369), 2019-09-05

Putative CHOP-REs

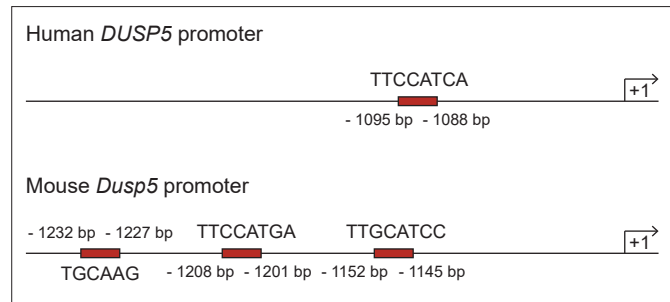

**Supplementary Figure 1**

Supplement: s1 [file s1]
